# Supplementary material
Source: PubMed Central journal article supplement (PMC3594017)
Supplement: mt2012222x1.pdf [file mt2012222x1.pdf]

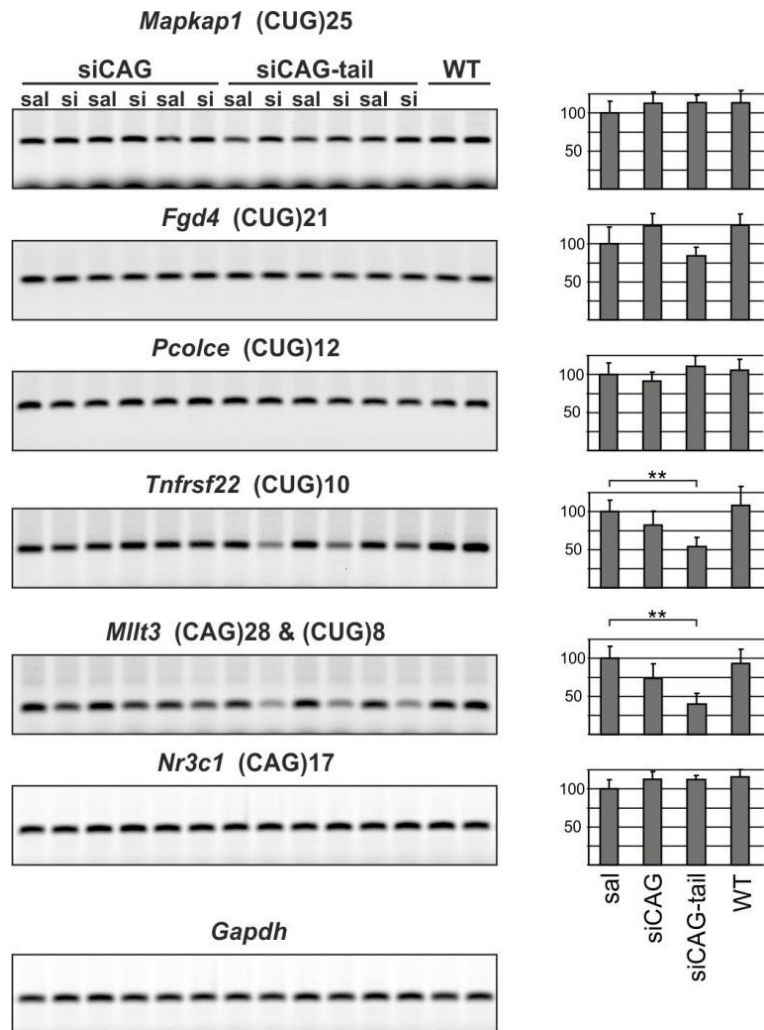

**Supplementary Figure S1. Semi-quantitative RT-PCR for seven mouse transcripts that contain CUG or CAG repeats.**

The length of the repeat tract for each transcript is indicated. Assays were performed using RNA isolated from saline (sal) or siCAG (si) electroporated TA muscle of  $HSA^{LR}$ , and compared to untreated TA muscle from wild type mice (WT). The bar graph shows mean  $\pm$  SD from three treated mice and two independent RT-PCR assays, normalized to *Gapdh*. \*\*  $P < 0.05$  for siCAG-tail versus saline treated muscles (Student's *t*-test).
