# Supplementary material
Source: PubMed Central journal article supplement (PMC3594017)
Supplement: mt2012222x2.pdf [file mt2012222x2.pdf]

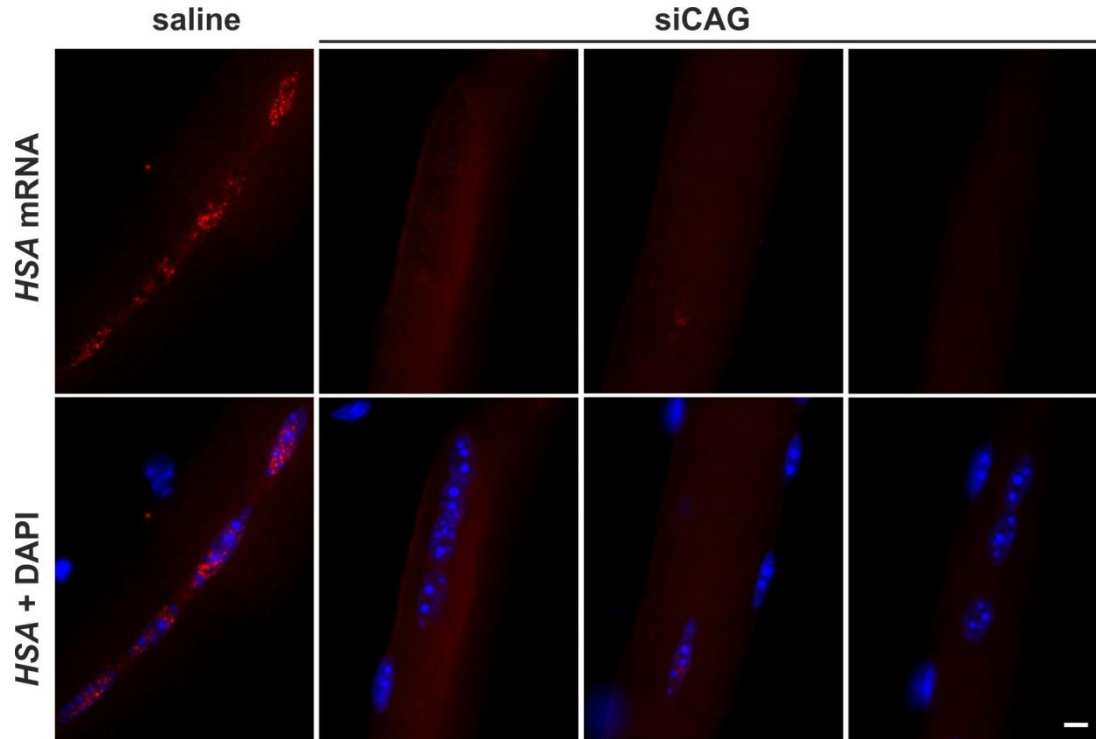

**Supplementary Figure S2. FISH analysis of nuclear RNA foci in isolated FDB muscle fibers using a transgene-specific oligonucleotide probe.**

The probe hybridizes to *HSA*<sup>LR</sup> transgene mRNA outside of the CUG repeat tract. The nuclear foci (red) are reduced by electroporation of siCAG, as compared to control fibers having electroporation of saline. The nuclei are counterstained blue (DAPI). Scale bar = 5  $\mu$ m.
