# Supplementary material
Source: PubMed Central journal article supplement (PMC3594017)
Supplement: mt2012222x3.pdf [file mt2012222x3.pdf]

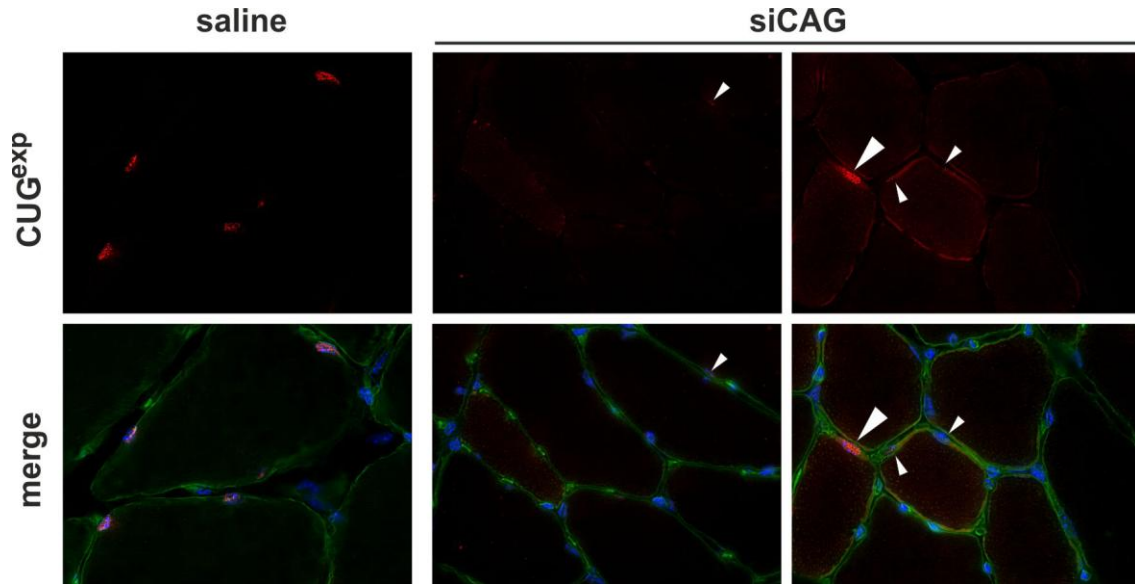

**Supplementary Figure S3. FISH showing nuclear foci of CUG<sup>exp</sup> transcripts in transverse sections of saline- or siCAG-treated TA muscle.**

To distinguish muscle fibers from interstitial cells, the extracellular matrix is outlined using wheat germ agglutinin (green). In *HSA<sup>LR</sup>* mice, CUG<sup>exp</sup> RNA is expressed only in myonuclei. siCAG-induced reduction of nuclear foci (red) is variable between muscle fibers. Some muscle nuclei in siCAG-treated muscle have CUG<sup>exp</sup> foci similar to saline-treated controls (large arrowhead), but other nuclei have few foci (small arrowhead) or absence of foci. Nuclei are counterstained blue (DAPI).
