# Supplementary material
Source: PubMed Central journal article supplement (PMC3594017)
Supplement: mt2012222x4.pdf [file mt2012222x4.pdf]

**a** siCAG and control siRNA treated  $HSA^{LR}$  mice

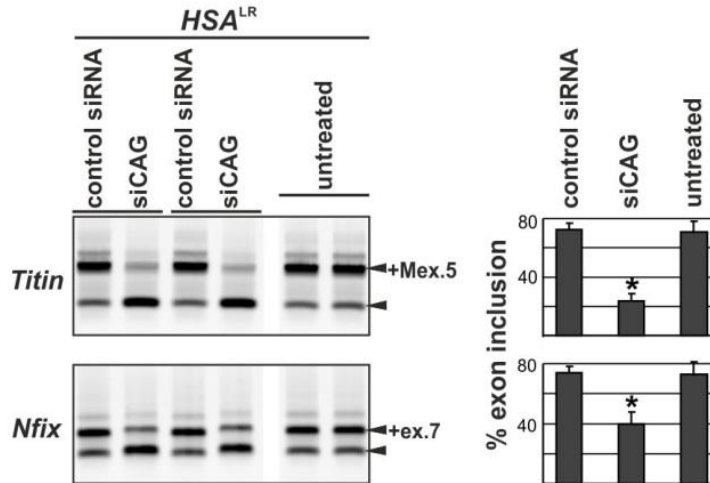

**b** siCAG treated WT mice

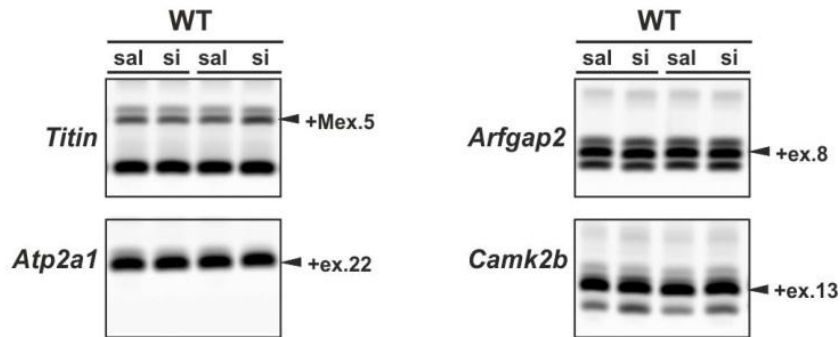

**Supplementary Figure S4. Alternative splicing of DM1-dysregulated transcripts is not affected by electroporation of control siRNA in  $HSA^{LR}$  mice, or by siCAG in WT mice.**

**(a)** TA muscle from  $HSA^{LR}$  mice was taken 7 days after electroporation of control siRNA (3  $\mu$ g) having no known target. siCAG (3  $\mu$ g) was electroporated into the contralateral TA. Alternative splicing of *Titin* M-exon 5 and *Nfix* exon 7 was compared with untreated TA from  $HSA^{LR}$  mice. Graphs show quantitative analyses of RT-PCR products based on two independent experiments (mean  $\pm$  SD). The results are expressed as the percentage of splice products that include the indicated alternative exon (\*  $P < 0.0001$  - Student's  $t$ -test for comparison with saline treated TAs). **(b)** The splicing pattern of four DM1-affected exons in TA muscles of two wild type mice. Muscle was taken 7 days after electroporation of saline (sal) or 3  $\mu$ g of siCAG (si).
