# Supplementary material
Source: PubMed Central journal article supplement (PMC3594017)
Supplement: mt2012222x5.pdf [file mt2012222x5.pdf]

siCAG and ssCAG treated  $HSA^{LR}$  mice

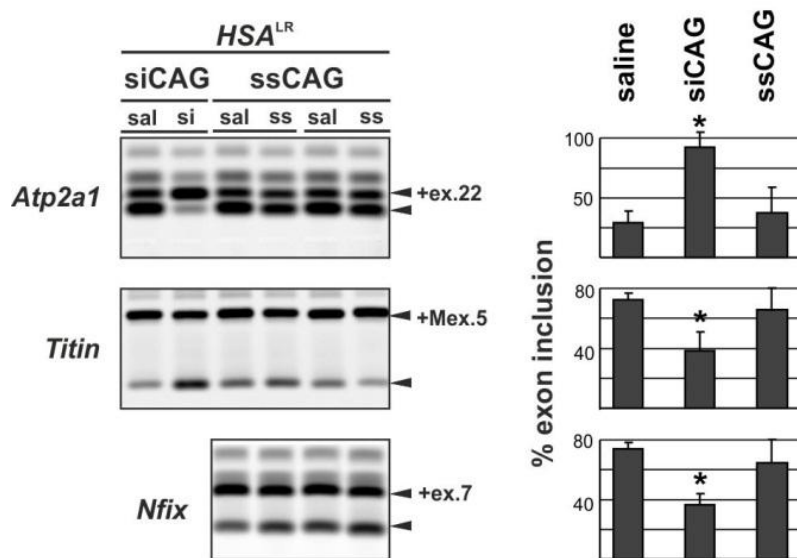

**Supplementary Figure S5. CAG repeat strand is more active if introduced as siCAG duplex than as single-stranded oligoribonucleotide.**

Alternative splicing pattern for three transcripts in TA muscle, seven days after electroporation of saline (sal), siCAG (si, 3  $\mu$ g) or ssCAG (ss, 3  $\mu$ g). ssCAG is the CAG repeat strand of the siCAG duplex. Graphs summarize RT-PCR analyses from at least four mice injected with saline or siCAG and two animals treated with ssCAG. Results are expressed as mean  $\pm$  SD (\*  $P < 0.0001$  - Student's  $t$ -test for comparison with saline treatment).
