# Supplementary material
Source: PubMed Central journal article supplement (PMC3594017)
Supplement: mt2012222x6.pdf [file mt2012222x6.pdf]

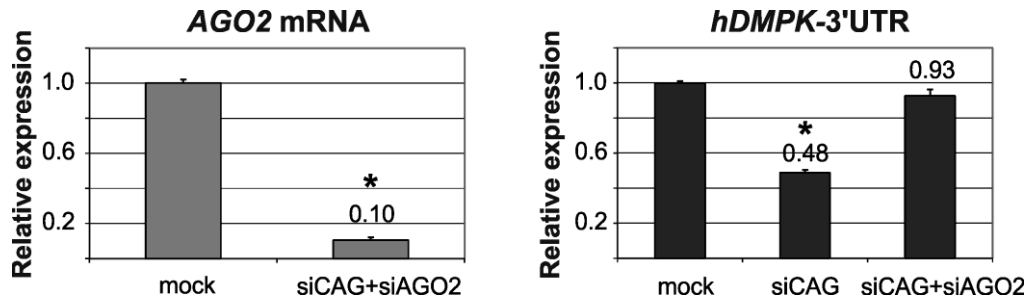

**Supplementary Figure S6. AGO2 influence activity of siCAG.**

Quantitative real-time PCR results of AGO2 mRNA (left graph) and human DMPK-3'UTR (right graph) normalized to 18S rRNA were displayed as relative quantity. Taq-Man assays were performed using RNA isolated from mock treated or siCAG transfected or siCAG and siAGO2 simultaneously transfected (siCAG+siAGO2) HT1080-800R cells stably expressing human DMPK-3'UTR with ~800 CUG repeats. Results are expressed as mean  $\pm$  SD from three independent experiments (\*  $P < 0.0001$  - Student's  $t$ -test for comparison with mock transfection).
