# Supplementary material
Source: PubMed Central journal article supplement (PMC3594017)
Supplement: mt2012222x7.pdf [file mt2012222x7.pdf]

## Supplementary Materials

**Supplementary Table S1.** Mouse Ref-Seq sequences of mRNAs containing at least (CTG)<sub>7</sub> or (CAG)<sub>7</sub> repeat tract.

| Repeat sequence | Gene name       | Gene description                                                                                                    |
|-----------------|-----------------|---------------------------------------------------------------------------------------------------------------------|
| CTG             | Angel1          | angel homolog 1 ( <i>Drosophila</i> ) (Angel1), mRNA                                                                |
| CTG             | Armxc6          | armadillo repeat containing, X-linked 6 (Armxc6), mRNA                                                              |
| CTG             | Cpd             | carboxypeptidase D (Cpd), mRNA                                                                                      |
| CTG             | Coch            | coagulation factor C homolog ( <i>Limulus polyphemus</i> ) (Coch), mRNA                                             |
| CTG             | Crb2            | crumbs homolog 2 ( <i>Drosophila</i> ) (Crb2), mRNA                                                                 |
| CTG             | Cyp2s1          | cytochrome P450, family 2, subfamily s, polypeptide 1 (Cyp2s1), mRNA                                                |
| CTG             | Cpeb3           | cytoplasmic polyadenylation element binding protein 3 (Cpeb3), mRNA                                                 |
| CTG             | Ctu2            | cytosolic thiouridylase subunit 2 homolog ( <i>S. pombe</i> ) (Ctu2), mRNA                                          |
| CTG             | Efna2           | ephrin A2 (Efna2), mRNA                                                                                             |
| CTG             | Efna3           | ephrin A3 (Efna3), mRNA                                                                                             |
| CTG             | Fbxo21          | F-box protein 21 (Fbxo21), mRNA                                                                                     |
| CTG             | Frem2           | Fras1 related extracellular matrix protein 2 (Frem2), mRNA                                                          |
| CTG             | Fuca1           | fucosidase, alpha-L- 1, tissue (Fuca1), mRNA                                                                        |
| CTG             | <b>Fgd4</b>     | FYVE, RhoGEF and PH domain containing 4 (Fgd4), transcript variant gamma, mRNA                                      |
| CTG             | Gpr3711         | G protein-coupled receptor 37-like 1 (Gpr3711), mRNA                                                                |
| CTG             | Greb1           | gene regulated by estrogen in breast cancer protein (Greb1), mRNA                                                   |
| CTG             | Heg1            | HEG homolog 1 (zebrafish) (Heg1), mRNA                                                                              |
| CTG             | Hsd3b6          | hydroxy-delta-5-steroid dehydrogenase, 3 beta- and steroid delta-isomerase 6 (Hsd3b6), mRNA                         |
| CTG             | Inhbe           | inhibin beta E (Inhbe), mRNA                                                                                        |
| CTG             | Itgav           | integrin alpha V (Itgav), mRNA                                                                                      |
| CTG             | Klc1            | kinesin light chain 1 (Klc1), transcript variant d, mRNA                                                            |
| CTG             | Mrpl1           | mitochondrial ribosomal protein L1 (Mrpl1), nuclear gene encoding mitochondrial protein mRNA                        |
| CTG             | <b>Mapkap1</b>  | mitogen-activated protein kinase associated protein 1 (Mapkap1), mRNA                                               |
| CTG             | <b>Milt3</b>    | myeloid/lymphoid or mixed-lineage leukemia (trithorax homolog, <i>Drosophila</i> ); translocated to, 3 (Milt3) mRNA |
| CTG             | Ngfr            | nerve growth factor receptor (TNFR superfamily, member 16) (Ngfr), mRNA                                             |
| CTG             | Ndr3            | N-myc downstream regulated gene 3 (Ndr3) mRNA                                                                       |
| CTG             | Ncapd3          | non-SMC condensin II complex, subunit D3 (Ncapd3), mRNA                                                             |
| CTG             | Pla2g15         | phospholipase A2, group XV (Pla2g15), mRNA                                                                          |
| CTG             | Kcna6           | potassium voltage-gated channel, shaker-related, subfamily, member 6 (Kcna6), mRNA                                  |
| CTG             | <b>Pcolce</b>   | procollagen C-endopeptidase enhancer protein (Pcolce), mRNA                                                         |
| CTG             | Pacsin2         | protein kinase C and casein kinase substrate in neurons 2 (Pacsin2) mRNA                                            |
| CTG             | Ppp1cc          | protein phosphatase 1, catalytic subunit, gamma isoform (Ppp1cc), mRNA                                              |
| CTG             | Ramp2           | receptor (calcitonin) activity modifying protein 2 (Ramp2), mRNA                                                    |
| CTG             | Arhgap28        | Rho GTPase activating protein 28 (Arhgap28), mRNA                                                                   |
| CTG             | Scube2          | signal peptide, CUB domain, EGF-like 2 (Scube2), mRNA                                                               |
| CTG             | Sorcs2          | sortilin-related VPS10 domain containing receptor 2 (Sorcs2), mRNA                                                  |
| CTG             | Spsb4           | splA/ryanodine receptor domain and SOCS box containing 4 (Spsb4), mRNA                                              |
| CTG             | <b>Txlnb</b>    | taxilin beta (Txlnb), mRNA                                                                                          |
| CTG             | Ttc7            | tetratricopeptide repeat domain 7 (Ttc7), mRNA                                                                      |
| CTG             | Tacc1           | transforming, acidic coiled-coil containing protein 1 (Tacc1) mRNA                                                  |
| CTG             | Tmem28          | transmembrane protein 28 (Tmem28), mRNA                                                                             |
| CTG             | <b>Tnfrsf22</b> | tumor necrosis factor receptor superfamily, member 22 (Tnfrsf22), mRNA                                              |
| CTG             | Tnfrsf25        | tumor necrosis factor receptor superfamily, member 25 (Tnfrsf25), mRNA                                              |

  

| Repeat sequence | Gene name | Gene description                                                                            |
|-----------------|-----------|---------------------------------------------------------------------------------------------|
| CAG             | Atrx      | alpha thalassemia/mental retardation syndrome X-linked homolog (human) (Atrx), mRNA         |
| CAG             | Ankhd1    | ankyrin repeat and KH domain containing 1 (Ankhd1), mRNA                                    |
| CAG             | Aak1      | AP2 associated kinase 1 (Aak1) mRNA                                                         |
| CAG             | Arid3b    | AT rich interactive domain 3B (BRIGHT-like) (Arid3b), mRNA                                  |
| CAG             | Bmp6      | bone morphogenetic protein 6 (Bmp6), mRNA                                                   |
| CAG             | Brf2      | BRF2, subunit of RNA polymerase III transcription initiation factor, BRF1-like (Brf2), mRNA |
| CAG             | Brpf1     | bromodomain and PHD finger containing, 1 (Brpf1), mRNA                                      |

|     |              |                                                                                                                   |
|-----|--------------|-------------------------------------------------------------------------------------------------------------------|
| CAG | Brd4         | bromodomain containing 4 (Brd4) mRNA                                                                              |
| CAG | Brdt         | bromodomain, testis-specific (Brdt) mRNA                                                                          |
| CAG | Capn6        | calpain 6 (Capn6), mRNA                                                                                           |
| CAG | Cpd          | CD74 antigen (invariant polypeptide of major histocompatibility complex, class II antigen-associated) (Cd74) mRNA |
| CAG | Chga         | chromogranin A (Chga), mRNA                                                                                       |
| CAG | Clock        | circadian locomotor output cycles kaput (Clock), mRNA                                                             |
| CAG | Cpsf4        | cleavage and polyadenylation specific factor 4 (Cpsf4), mRNA                                                      |
| CAG | Cxxc1        | CXXC finger 1 (PHD domain) (Cxxc1), mRNA                                                                          |
| CAG | <b>Dap</b>   | death-associated protein (Dap), mRNA                                                                              |
| CAG | Dner         | delta/notch-like EGF-related receptor (Dner), mRNA                                                                |
| CAG | Dennd4b      | DENN/MADD domain containing 4B (Dennd4b), mRNA                                                                    |
| CAG | Dusp8        | dual specificity phosphatase 8 (Dusp8), mRNA                                                                      |
| CAG | Ep300        | E1A binding protein p300 (Ep300), mRNA                                                                            |
| CAG | Ep400        | E1A binding protein p400 (Ep400) mRNA                                                                             |
| CAG | E2f4         | E2F transcription factor 4 (E2f4), mRNA                                                                           |
| CAG | Ecsr         | endothelial cell-specific chemotaxis regulator (Ecsr), mRNA                                                       |
| CAG | Edc4         | enhancer of mRNA decapping 4 (Edc4), mRNA                                                                         |
| CAG | Fam155a      | family with sequence similarity 155, member A (Fam155a), mRNA                                                     |
| CAG | Fam168b      | family with sequence similarity 168, member B (Fam168b) mRNA                                                      |
| CAG | Fam170b      | family with sequence similarity 170, member B (Fam170b), mRNA                                                     |
| CAG | Fam171b      | family with sequence similarity 171, member B (Fam171b), mRNA                                                     |
| CAG | Fam53b       | family with sequence similarity 53, member B (Fam53b), mRNA                                                       |
| CAG | Fbxo38       | F-box protein 38 (Fbxo38), mRNA                                                                                   |
| CAG | Fgfr2        | fibroblast growth factor receptor 2 (Fgfr2) mRNA                                                                  |
| CAG | Foxp1        | forkhead box P1 (Foxp1), mRNA                                                                                     |
| CAG | Gpr137b      | G protein-coupled receptor 137B (Gpr137b), mRNA                                                                   |
| CAG | Gls          | glutaminase (Gls), nuclear gene encoding mitochondrial protein mRNA                                               |
| CAG | Glrp1        | glutamine repeat protein 1 (Glrp1), mRNA                                                                          |
| CAG | Glyctk       | glycerate kinase (Glyctk) mRNA                                                                                    |
| CAG | Gigyf1       | GRB10 interacting GYF protein 1 (Gigyf1), mRNA                                                                    |
| CAG | Gigyf2       | GRB10 interacting GYF protein 2 (Gigyf2) mRNA                                                                     |
| CAG | Gas2         | growth arrest specific 2 (Gas2), mRNA                                                                             |
| CAG | Gab3         | growth factor receptor bound protein 2-associated protein 3 (Gab3), mRNA                                          |
| CAG | Bat2l        | HLA-B associated transcript 2-like (Bat2l) mRNA                                                                   |
| CAG | Bat2l2       | HLA-B associated transcript 2-like 2 (Bat2l2), mRNA                                                               |
| CAG | Hcn1         | hyperpolarization-activated, cyclic nucleotide-gated K+ 1 (Hcn1), mRNA                                            |
| CAG | Igsf10       | immunoglobulin superfamily, member 10 (Igsf10), mRNA                                                              |
| CAG | Ing2         | inhibitor of growth family, member 2 (Ing2), mRNA                                                                 |
| CAG | Irs1         | insulin receptor substrate 1 (Irs1), mRNA                                                                         |
| CAG | Il2          | interleukin 2 (Il2), mRNA                                                                                         |
| CAG | Ivl          | involucrin (Ivl), mRNA                                                                                            |
| CAG | Kdm6b        | KDM1 lysine (K)-specific demethylase 6B (Kdm6b), mRNA                                                             |
| CAG | Krt76        | keratin 76 (Krt76), mRNA                                                                                          |
| CAG | Maml2        | mastermind like 2 (Drosophila) (Maml2) mRNA                                                                       |
| CAG | Maml3        | mastermind like 3 (Drosophila) (Maml3), mRNA                                                                      |
| CAG | Mamld1       | mastermind-like domain containing 1 (Mamld1), mRNA                                                                |
| CAG | Med15        | mediator complex subunit 15 (Med15) mRNA                                                                          |
| CAG | Med12l       | mediator of RNA polymerase II transcription, subunit 12 homolog (yeast)-like (Med12l), mRNA                       |
| CAG | Mn1          | meningioma 1 (Mn1), mRNA                                                                                          |
| CAG | Mblac2       | metallo-beta-lactamase domain containing 2 (Mblac2), mRNA                                                         |
| CAG | Mink1        | misshapen-like kinase 1 (zebrafish) (Mink1) mRNA                                                                  |
| CAG | Mkl1         | MKL (megakaryoblastic leukemia)/myocardin-like 1 (Mkl1) mRNA                                                      |
| CAG | Megf10       | multiple EGF-like-domains 10 (Megf10), mRNA                                                                       |
| CAG | Mll2         | myeloid/lymphoid or mixed-lineage leukemia 2 (Mll2), mRNA                                                         |
| CAG | Mll3         | myeloid/lymphoid or mixed-lineage leukemia 3 (Mll3), mRNA                                                         |
| CAG | Myocd        | myocardin (Myocd), transcript variant A, mRNA                                                                     |
| CAG | Nrg2         | neuregulin 2 (Nrg2), mRNA                                                                                         |
| CAG | Nav2         | neuron navigator 2 (Nav2) mRNA                                                                                    |
| CAG | Nrk          | Nik related kinase (Nrk), mRNA                                                                                    |
| CAG | Nufip2       | nuclear fragile X mental retardation protein interacting protein 2 (Nufip2), mRNA                                 |
| CAG | Ncor1        | nuclear receptor co-repressor 1 (Ncor1), mRNA                                                                     |
| CAG | <b>Nr3c1</b> | nuclear receptor subfamily 3, group C, member 1 (Nr3c1), mRNA                                                     |
| CAG | Nolc1        | nucleolar and coiled-body phosphoprotein 1 (Nolc1) mRNA                                                           |
| CAG | Nup54        | nucleoporin 54 (Nup54), mRNA                                                                                      |

|     |            |                                                                                                                                  |
|-----|------------|----------------------------------------------------------------------------------------------------------------------------------|
| CAG | Nap1l3     | nucleosome assembly protein 1-like 3 (Nap1l3), mRNA                                                                              |
| CAG | Otx2os1    | Otx2 opposite strand transcript 1 (Otx2os1), non-coding RNA                                                                      |
| CAG | Paxip1     | PAX interacting (with transcription-activation domain) protein 1 (Paxip1), mRNA                                                  |
| CAG | Pprc1      | peroxisome proliferative activated receptor, gamma, coactivator-related 1 (Pprc1), mRNA                                          |
| CAG | Phlpp1     | PH domain and leucine rich repeat protein phosphatase 1 (Phlpp1), mRNA                                                           |
| CAG | Phf21a     | PHD finger protein 21A (Phf21a) mRNA                                                                                             |
| CAG | Plekhm3    | pleckstrin homology domain containing, family M, member 3 (Plekhm3), mRNA                                                        |
| CAG | Kcnn3      | potassium intermediate/small conductance calcium-activated channel, subfamily N, member 3 (Kcnn3), mRNA                          |
| CAG | Kcnh3      | potassium voltage-gated channel, subfamily H (eag-related), member 3 (Kcnh3), mRNA                                               |
| CAG | Pou3f2     | POU domain, class 3, transcription factor 2 (Pou3f2), mRNA                                                                       |
| CAG | Pou4f1     | POU domain, class 4, transcription factor 1 (Pou4f1), mRNA                                                                       |
| CAG | Pum2       | pumilio 2 (Drosophila) (Pum2) mRNA                                                                                               |
| CAG | Rpa1       | replication protein A1 (Rpa1) mRNA                                                                                               |
| CAG | Rbm33      | RNA binding motif protein 33 (Rbm33), mRNA                                                                                       |
| CAG | Runx2      | runt related transcription factor 2 (Runx2) mRNA                                                                                 |
| CAG | Sec24b     | Sec24 related gene family, member B ( <i>S. cerevisiae</i> ) (Sec24b), mRNA                                                      |
| CAG | Sel1l3     | sel-1 suppressor of lin-12-like 3 ( <i>C. elegans</i> ) (Sel1l3), mRNA                                                           |
| CAG | Srrm4      | serine/arginine repetitive matrix 4 (Srrm4), mRNA                                                                                |
| CAG | Siah1b     | seven in absentia 1B (Siah1b), mRNA                                                                                              |
| CAG | Sry        | sex determining region of Chr Y (Sry), mRNA                                                                                      |
| CAG | Sik3       | SIK family kinase 3 (Sik3), mRNA                                                                                                 |
| CAG | Slc43a3    | solute carrier family 43, member 3 (Slc43a3), mRNA                                                                               |
| CAG | Spnb5      | spectrin beta 5 (Spnb5), mRNA                                                                                                    |
| CAG | Speg       | SPEG complex locus (Speg) mRNA                                                                                                   |
| CAG | Spn        | SPEN homolog, transcriptional regulator ( <i>Drosophila</i> ) (Spn), mRNA                                                        |
| CAG | Sf1        | splicing factor 1 (Sf1) mRNA                                                                                                     |
| CAG | Sfrs15     | splicing factor, arginine/serine-rich 15 (Sfrs15), mRNA                                                                          |
| CAG | St6galnac5 | ST6 (alpha-N-acetyl-neuraminyl-2,3-beta-galactosyl-1,3)-N-acetylgalactosaminide alpha-2,6-sialyltransferase 5 (St6galnac5), mRNA |
| CAG | Smarca2    | SWI/SNF related, matrix associated, actin dependent regulator of chromatin, subfamily a, member 2 (Smarca2) mRNA                 |
| CAG | Tet2       | tet oncogene family member 2 (Tet2), mRNA                                                                                        |
| CAG | Tanc2      | tetratricopeptide repeat, ankyrin repeat and coiled-coil containing 2 (Tanc2), mRNA                                              |
| CAG | Trappc9    | trafficking protein particle complex 9 (Trappc9) mRNA                                                                            |
| CAG | Tcf20      | transcription factor 20 (Tcf20) mRNA                                                                                             |
| CAG | Tcf7       | transcription factor EB (Tcf7) mRNA                                                                                              |
| CAG | Tob1       | transducer of ErbB-2.1 (Tob1), mRNA                                                                                              |
| CAG | Trp63      | transformation related protein 63 (Trp63) mRNA                                                                                   |
| CAG | Tnrc18     | trinucleotide repeat containing 18 (Tnrc18), transcript variant A, mRNA                                                          |
| CAG | Tnrc6b     | trinucleotide repeat containing 6b (Tnrc6b) mRNA                                                                                 |
| CAG | Tsc22d1    | TSC22 domain family, member 1 (Tsc22d1) mRNA                                                                                     |
| CAG | Tusc5      | tumor suppressor candidate 5 (Tusc5), mRNA                                                                                       |
| CAG | Usp7       | ubiquitin specific peptidase 7 (Usp7), mRNA                                                                                      |
| CAG | Vezf1      | vascular endothelial zinc finger 1 (Vezf1), mRNA                                                                                 |
| CAG | Celf3      | VCUGBP, Elav-like family member 3 (Celf3), mRNA                                                                                  |
| CAG | Zfhx3      | zinc finger homeobox 3 (Zfhx3), mRNA                                                                                             |
| CAG | Zfp295     | zinc finger protein 295 (Zfp295) mRNA                                                                                            |
| CAG | Zfp384     | zinc finger protein 384 (Zfp384), mRNA                                                                                           |
| CAG | Zfp609     | zinc finger protein 609 (Zfp609), mRNA                                                                                           |
| CAG | Zfp773     | zinc finger protein 773 (Zfp773), mRNA                                                                                           |
| CAG | Zfc3h1     | zinc finger, C3H1-type containing (Zfc3h1), mRNA                                                                                 |
| CAG | Zcchc10    | zinc finger, CCHC domain containing 10 (Zcchc10), mRNA                                                                           |

yellow, transcripts with CAG repeats analyzed in this study

orange, transcripts with CUG repeats analyzed in this study

blue, genes with medium and high level of expression in mouse skeletal muscles
