# Supplementary material
Source: PubMed Central journal article supplement (PMC3594017)
Supplement: mt2012222x8.pdf [file mt2012222x8.pdf]

**Supplementary Table S2.** Primers used for RT-PCR amplification of endogenous transcripts containing either CUG or CAG repeats.

| Primer name            | Sequence (5'-3')                                     | Repeat length and its location <sup>1</sup> | No. of PCR cycles (Ta) <sup>2</sup> |
|------------------------|------------------------------------------------------|---------------------------------------------|-------------------------------------|
| Mapkap1 F<br>Mapkap1 R | ACCCTGTTACGAATCAGAAAGCCA<br>TCTGGAAGCTGAAGCTTGTTTCG  | (CUG)25, 3' UTR                             | 25 (55°C)                           |
| Fgd4 F<br>Fgd4 R       | ACTAGCAGCTCGGAACACATCAGC<br>TCAGGAAGCTTTGGCAAGACTGG  | (CUG)21, 3' UTR                             | 25 (55°C)                           |
| Pcolce F<br>Pcolce R   | TGGGGCCATTCCTTTTGGCCTG<br>AGACCTCCAGAGCATCGTAGC      | (CUG)12, 5' UTR                             | 23 (55°C)                           |
| Mllt3 F<br>Mllt3 R     | TCTCATGTCAAGATGGGAAAGGTC<br>CCGAGTCATTGTCATTGTCCTCTG | (CUG)8, 5' UTR<br>(CAG)28, ORF              | 23 (55°C)                           |
| Nr3c1 F<br>Nr3c1 R     | TTGGGGGCTATGAACTTCGCAGG<br>TCGAGCTTCCAGGTTTCATTCCAGC | (CAG)17, ORF                                | 23 (55°C)                           |

<sup>1</sup> ORF, open reading frame

<sup>2</sup> Ta, annealing temperature
